# Supplementary material for: Boosting engineering strategies for plastic hydrocracking applications: a machine learning-based multi-objective optimization framework
Source: Royal Society of Chemistry journal article supplement (doi:10.1039/d4gc05259e), 2025-01-01
Supplement: d4gc05259e1.xlsx [file d4gc05259e1.xlsx]

## Sheet: Sheet1
ratio	b1	b2	gas	naphtha	diesel	heavy	WART
480	320	320	0.163637	0.217872	0.241771	0.37672	322.758
480	320	330	0.176078	0.229888	0.240889	0.353145	330.09
480	320	340	0.197305	0.250202	0.236505	0.315987	338.392
480	320	350	0.230209	0.279103	0.222814	0.267874	347.962
480	320	360	0.27289	0.307165	0.197725	0.222219	358.817
480	320	370	0.324338	0.315401	0.175011	0.185251	370.127
480	320	380	0.391385	0.292713	0.163477	0.152426	381.132
480	330	320	0.169939	0.227873	0.242081	0.360108	326.526
480	330	330	0.181453	0.238679	0.240446	0.339422	333.837
480	330	340	0.200933	0.256991	0.235345	0.306731	342.031
480	330	350	0.230989	0.283009	0.221987	0.264015	351.279
480	330	360	0.270971	0.308921	0.19858	0.221529	361.692
480	330	370	0.319969	0.317266	0.177021	0.185744	372.611
480	330	380	0.383244	0.297189	0.165705	0.153861	383.314
480	340	320	0.180577	0.2427	0.240732	0.335991	330.594
480	340	330	0.190767	0.251742	0.238238	0.319253	337.9
480	340	340	0.207586	0.266926	0.232514	0.292975	345.857
480	340	350	0.233459	0.288537	0.220062	0.257942	354.645
480	340	360	0.269461	0.311034	0.199227	0.220278	364.524
480	340	370	0.316153	0.319135	0.179037	0.185675	375.095
480	340	380	0.376557	0.300995	0.168012	0.154437	385.551
480	350	320	0.197992	0.264472	0.235025	0.302511	335.22
480	350	330	0.206219	0.270935	0.231891	0.290956	342.427
480	350	340	0.21925	0.281647	0.226143	0.272961	350
480	350	350	0.239447	0.297072	0.215637	0.247844	358.262
480	350	360	0.269271	0.314032	0.199026	0.217671	367.477
480	350	370	0.312212	0.321106	0.181249	0.185432	377.609
480	350	380	0.371133	0.304272	0.170486	0.154109	387.909
480	360	320	0.223012	0.292273	0.221091	0.263624	340.29
480	360	330	0.228854	0.295528	0.218266	0.257353	347.234
480	360	340	0.237827	0.30119	0.213734	0.247249	354.467
480	360	350	0.251815	0.309512	0.206568	0.232104	362.214
480	360	360	0.273568	0.318961	0.196053	0.211418	370.658
480	360	370	0.30846	0.323188	0.183384	0.184968	380.045
480	360	380	0.364111	0.30825	0.173414	0.154225	390.19
480	370	340	0.263989	0.320108	0.196044	0.219858	359.392
480	370	350	0.273006	0.32244	0.192956	0.211598	366.62
480	370	360	0.287409	0.324924	0.188742	0.198925	374.288
480	370	370	0.311344	0.324716	0.18318	0.18076	382.622
480	370	380	0.353373	0.313541	0.176889	0.156198	391.892
480	380	350	0.305698	0.325752	0.180665	0.187885	371.528
480	380	360	0.315409	0.32446	0.180198	0.179932	378.65
480	380	370	0.331246	0.321107	0.17953	0.168117	386.144
480	380	380	0.357749	0.311979	0.178231	0.15204	394.193
485	320	330	0.176849	0.230852	0.240842	0.351457	330.059
485	320	340	0.197868	0.250902	0.236365	0.314864	338.358
485	320	350	0.230551	0.279526	0.222655	0.267268	347.917
485	320	360	0.273072	0.307355	0.19766	0.221913	358.759
485	320	370	0.324332	0.315465	0.175068	0.185134	370.055
485	320	380	0.391131	0.29287	0.163558	0.152441	381.054
485	330	320	0.170812	0.228979	0.242047	0.358162	326.498
485	330	330	0.182185	0.239598	0.240341	0.337876	333.809
485	330	340	0.201465	0.257658	0.235183	0.305695	341.997
485	330	350	0.23129	0.283399	0.221843	0.263468	351.23
485	330	360	0.271114	0.309093	0.198538	0.221255	361.631
485	330	370	0.32	0.317328	0.177071	0.185601	372.543
485	330	380	0.383084	0.297299	0.165782	0.153834	383.242
485	340	320	0.181353	0.243681	0.240594	0.334372	330.572
485	340	330	0.19143	0.252574	0.238063	0.317933	337.878
485	340	340	0.208072	0.267542	0.232323	0.292063	345.823
485	340	350	0.233728	0.288896	0.219926	0.25745	354.594
485	340	360	0.269552	0.311184	0.199213	0.220051	364.458
485	340	370	0.316165	0.319199	0.179093	0.185544	375.027
485	340	380	0.376474	0.301068	0.168084	0.154374	385.485
485	350	320	0.198581	0.265219	0.234805	0.301395	335.195
485	350	330	0.206739	0.27159	0.231667	0.290003	342.397
485	350	340	0.219663	0.282165	0.225934	0.272238	349.961
485	350	350	0.239709	0.297407	0.215492	0.247392	358.212
485	350	360	0.269349	0.314176	0.199014	0.217461	367.412
485	350	370	0.312158	0.321175	0.18132	0.185348	377.538
485	350	380	0.371047	0.304343	0.170558	0.154052	387.846
485	360	320	0.22335	0.292707	0.220908	0.263035	340.251
485	360	330	0.229183	0.295934	0.218083	0.256799	347.194
485	360	340	0.238132	0.301546	0.213564	0.246758	354.425
485	360	350	0.252062	0.30978	0.206439	0.231718	362.165
485	360	360	0.273697	0.319105	0.196017	0.211181	370.6
485	360	370	0.308401	0.323257	0.183447	0.184895	379.975
485	360	380	0.363926	0.30836	0.173489	0.154225	390.121
485	370	320	0.254315	0.318434	0.199756	0.227495	345.614
485	370	330	0.258317	0.31888	0.198213	0.22459	352.381
485	370	340	0.264179	0.320276	0.195996	0.219549	359.344
485	370	360	0.287556	0.325018	0.18873	0.198697	374.234
485	370	370	0.311388	0.324768	0.183211	0.180633	382.561
485	370	380	0.353219	0.313632	0.176952	0.156197	391.824
485	380	350	0.305776	0.325802	0.180721	0.187701	371.476
485	380	360	0.315474	0.324501	0.180249	0.179776	378.598
485	380	370	0.331279	0.321139	0.179577	0.168005	386.091
485	380	380	0.357719	0.312018	0.178277	0.151986	394.138
490	320	330	0.177623	0.231817	0.240786	0.349774	330.028
490	320	340	0.198428	0.251598	0.236223	0.313751	338.324
490	320	350	0.230885	0.279942	0.222499	0.266674	347.871
490	320	360	0.273251	0.307542	0.197597	0.22161	358.701
490	320	370	0.324332	0.315529	0.175125	0.185014	369.984
490	320	380	0.390884	0.293024	0.163639	0.152453	380.977
490	330	320	0.171688	0.230085	0.242003	0.356225	326.47
490	330	330	0.182919	0.240515	0.24023	0.336336	333.782
490	330	340	0.201993	0.258321	0.235018	0.304668	341.963
490	330	350	0.231585	0.283782	0.221702	0.262931	351.182
490	330	360	0.271251	0.309263	0.198499	0.220986	361.569
490	330	370	0.320032	0.31739	0.177121	0.185457	372.476
490	330	380	0.382929	0.297407	0.165859	0.153805	383.171
490	340	320	0.182128	0.244659	0.240449	0.332763	330.55
490	340	330	0.192091	0.253403	0.237884	0.316622	337.857
490	340	340	0.208556	0.268153	0.232131	0.291161	345.789
490	340	350	0.233991	0.28925	0.219792	0.256966	354.543
490	340	360	0.269638	0.311331	0.199202	0.219829	364.392
490	340	370	0.316175	0.319263	0.179149	0.185413	374.96
490	340	380	0.376394	0.301139	0.168157	0.15431	385.42
490	350	330	0.207253	0.272238	0.231445	0.289064	342.366
490	350	340	0.22007	0.282677	0.225727	0.271525	349.922
490	350	350	0.239967	0.297738	0.21535	0.246945	358.162
490	350	360	0.269425	0.31432	0.199003	0.217253	367.347
490	350	370	0.312101	0.321244	0.181391	0.185264	377.468
490	350	380	0.37096	0.304415	0.17063	0.153995	387.784
490	360	320	0.22368	0.293132	0.22073	0.262459	340.212
490	360	330	0.229504	0.296332	0.217907	0.256258	347.153
490	360	340	0.238429	0.301895	0.213399	0.246277	354.383
490	360	350	0.252304	0.310044	0.206314	0.231338	362.118
490	360	360	0.273826	0.319249	0.19598	0.210944	370.541
490	360	370	0.308343	0.323327	0.18351	0.18482	379.904
490	360	380	0.36374	0.30847	0.173564	0.154225	390.053
490	370	350	0.273373	0.322717	0.192881	0.211029	366.521
490	370	360	0.287703	0.32511	0.188719	0.198468	374.181
490	370	370	0.311434	0.32482	0.183242	0.180504	382.5
490	370	380	0.353067	0.313723	0.177016	0.156195	391.755
490	380	350	0.305857	0.325852	0.180776	0.187515	371.425
490	380	360	0.315544	0.32454	0.180299	0.179617	378.546
490	380	370	0.331317	0.32117	0.179624	0.167889	386.038
490	380	380	0.357691	0.312056	0.178324	0.151929	394.084
495	320	330	0.178398	0.232781	0.240723	0.348097	329.998
495	320	340	0.198986	0.25229	0.236077	0.312648	338.291
495	320	350	0.231211	0.28035	0.222346	0.266093	347.826
495	320	360	0.273426	0.307727	0.197536	0.221311	358.643
495	320	370	0.324337	0.315592	0.175181	0.18489	369.913
495	320	380	0.390643	0.293174	0.16372	0.152462	380.9
495	330	320	0.172565	0.23119	0.241949	0.354297	326.442
495	330	330	0.183653	0.241432	0.240112	0.334804	333.756
495	330	340	0.20252	0.258981	0.23485	0.303649	341.929
495	330	350	0.231873	0.284158	0.221563	0.262405	351.133
495	330	360	0.271383	0.309429	0.198464	0.220723	361.508
495	330	370	0.320066	0.317452	0.177171	0.185311	372.409
495	330	380	0.38278	0.297512	0.165936	0.153773	383.101
495	340	320	0.182902	0.245635	0.240297	0.331165	330.529
495	340	330	0.192751	0.254228	0.2377	0.315321	337.835
495	340	340	0.209035	0.26876	0.231938	0.290267	345.755
495	340	350	0.23425	0.2896	0.219659	0.25649	354.492
495	340	360	0.269719	0.311477	0.199193	0.219611	364.327
495	340	370	0.316183	0.319327	0.179206	0.185284	374.893
495	340	380	0.376317	0.301209	0.168229	0.154245	385.356
495	350	320	0.199744	0.266694	0.234364	0.299198	335.146
495	350	330	0.207762	0.272879	0.231223	0.288136	342.336
495	350	340	0.220473	0.283183	0.225522	0.270823	349.883
495	350	350	0.240221	0.298065	0.215209	0.246505	358.113
495	350	360	0.2695	0.314462	0.198992	0.217046	367.283
495	350	370	0.312042	0.321313	0.181463	0.185182	377.398
495	350	380	0.370873	0.304487	0.170702	0.153938	387.722
495	360	340	0.238718	0.302236	0.21324	0.245807	354.34
495	360	350	0.25254	0.310303	0.206193	0.230964	362.07
495	360	360	0.273954	0.319392	0.195945	0.210709	370.484
495	360	370	0.308287	0.323396	0.183572	0.184745	379.834
495	360	380	0.363552	0.308582	0.17364	0.154226	389.984
495	370	320	0.254607	0.318781	0.199697	0.226916	345.518
495	370	330	0.258648	0.319226	0.198135	0.22399	352.287
495	370	340	0.264537	0.320602	0.195912	0.218949	359.249
495	370	350	0.273551	0.322853	0.192847	0.210749	366.472
495	370	360	0.28785	0.325203	0.188708	0.198239	374.128
495	370	370	0.311483	0.324872	0.183272	0.180373	382.44
495	370	380	0.352917	0.313812	0.177079	0.156191	391.686
495	380	330	0.295813	0.327345	0.182051	0.194791	357.763
495	380	340	0.299838	0.326638	0.1814	0.192125	364.493
495	380	350	0.30594	0.325902	0.180831	0.187328	371.374
495	380	360	0.315617	0.324579	0.180349	0.179455	378.495
495	380	370	0.331358	0.3212	0.179671	0.167771	385.985
495	380	380	0.357667	0.312092	0.17837	0.151871	394.03
500	320	340	0.199541	0.252979	0.235928	0.311552	338.258
500	320	350	0.231529	0.280751	0.222196	0.265524	347.78
500	320	360	0.273597	0.307909	0.197479	0.221016	358.585
500	320	370	0.324346	0.315655	0.175236	0.184763	369.844
500	320	380	0.390408	0.293322	0.163801	0.152469	380.824
500	330	320	0.173443	0.232293	0.241886	0.352379	326.415
500	330	330	0.184387	0.242347	0.239987	0.333279	333.73
500	330	340	0.203044	0.259638	0.234681	0.302637	341.895
500	330	350	0.232155	0.284529	0.221427	0.261889	351.084
500	330	360	0.27151	0.309592	0.198433	0.220465	361.446
500	330	370	0.3201	0.317514	0.177221	0.185165	372.342
500	330	380	0.382636	0.297614	0.166012	0.153738	383.031
500	340	320	0.183675	0.246608	0.240139	0.329578	330.508
500	340	330	0.193409	0.25505	0.237513	0.314028	337.814
500	340	340	0.209512	0.269362	0.231744	0.289382	345.721
500	340	350	0.234505	0.289946	0.219528	0.25602	354.442
500	340	360	0.269795	0.31162	0.199186	0.219398	364.261
500	340	370	0.316189	0.319391	0.179264	0.185156	374.826
500	340	380	0.376243	0.301278	0.168301	0.154178	385.291
500	350	320	0.200318	0.267422	0.234142	0.298118	335.121
500	350	330	0.208266	0.273514	0.231002	0.287219	342.305
500	350	340	0.220869	0.283682	0.225319	0.270129	349.844
500	350	350	0.240471	0.298388	0.215071	0.24607	358.064
500	350	360	0.269574	0.314603	0.198982	0.216841	367.219
500	350	370	0.31198	0.321383	0.181536	0.185101	377.328
500	350	380	0.370784	0.30456	0.170774	0.153882	387.659
500	360	320	0.224315	0.293957	0.220389	0.261339	340.132
500	360	330	0.230119	0.297102	0.21757	0.255208	347.072
500	360	340	0.238999	0.302569	0.213086	0.245346	354.298
500	360	350	0.252771	0.310556	0.206076	0.230597	362.023
500	360	360	0.274081	0.319534	0.195911	0.210475	370.427
500	360	370	0.308228	0.323466	0.183636	0.184671	379.764
500	360	380	0.363362	0.308694	0.173716	0.154228	389.916
500	370	320	0.254738	0.318946	0.199675	0.22664	345.469
500	370	330	0.258801	0.319392	0.198104	0.223703	352.24
500	370	340	0.264706	0.320759	0.195876	0.218659	359.201
500	370	350	0.273723	0.322986	0.192816	0.210474	366.424
500	370	360	0.287995	0.325294	0.188699	0.198012	374.076
500	370	370	0.311533	0.324924	0.183303	0.18024	382.38
500	370	380	0.352769	0.313902	0.177143	0.156186	391.618
500	380	350	0.306024	0.32595	0.180885	0.18714	371.323
500	380	360	0.315693	0.324616	0.180399	0.179291	378.444
500	380	370	0.331404	0.321228	0.179717	0.16765	385.934
500	380	380	0.357646	0.312127	0.178417	0.15181	393.977
505	320	340	0.200094	0.253665	0.235776	0.310465	338.225
505	320	350	0.23184	0.281145	0.222049	0.264966	347.735
505	320	360	0.273763	0.308088	0.197424	0.220725	358.527
505	320	370	0.324359	0.315717	0.17529	0.184634	369.775
505	320	380	0.39018	0.293467	0.163881	0.152472	380.749
505	330	320	0.174321	0.233394	0.241812	0.350473	326.389
505	330	330	0.185122	0.243261	0.239855	0.331761	333.705
505	330	340	0.203566	0.260292	0.234508	0.301633	341.862
505	330	350	0.23243	0.284895	0.221293	0.261382	351.034
505	330	360	0.271629	0.309752	0.198405	0.220214	361.384
505	330	370	0.320136	0.317575	0.177271	0.185018	372.276
505	330	380	0.382498	0.297714	0.166088	0.1537	382.961
505	340	320	0.184447	0.247577	0.239974	0.328001	330.488
505	340	330	0.194065	0.255869	0.237321	0.312745	337.794
505	340	340	0.209986	0.269962	0.231549	0.288504	345.687
505	340	350	0.234756	0.290288	0.219399	0.255557	354.391
505	340	360	0.269867	0.311761	0.199182	0.219189	364.195
505	340	370	0.316193	0.319455	0.179323	0.18503	374.758
505	340	380	0.376171	0.301346	0.168374	0.15411	385.228
505	350	320	0.200889	0.268144	0.233919	0.297048	335.096
505	350	330	0.208765	0.274142	0.230781	0.286312	342.274
505	350	340	0.221262	0.284176	0.225117	0.269445	349.806
505	350	350	0.240717	0.298707	0.214934	0.245641	358.015
505	350	360	0.269645	0.314744	0.198972	0.216639	367.156
505	350	370	0.311916	0.321453	0.18161	0.185021	377.258
505	350	380	0.370694	0.304633	0.170847	0.153826	387.597
505	360	320	0.224622	0.294358	0.220226	0.260793	340.092
505	360	330	0.230416	0.297475	0.21741	0.2547	347.031
505	360	340	0.239272	0.302896	0.212937	0.244895	354.256
505	360	350	0.252996	0.310805	0.205963	0.230236	361.976
505	360	360	0.274207	0.319674	0.195877	0.210242	370.37
505	360	370	0.308161	0.323536	0.183702	0.184602	379.691
505	360	380	0.363171	0.308808	0.173792	0.15423	389.847
505	370	320	0.25486	0.319107	0.19966	0.226373	345.421
505	370	330	0.258944	0.319553	0.198078	0.223424	352.193
505	370	340	0.264867	0.320913	0.195844	0.218376	359.154
505	370	350	0.273891	0.323117	0.192788	0.210204	366.375
505	370	360	0.288139	0.325384	0.188691	0.197786	374.024
505	370	370	0.311585	0.324975	0.183334	0.180106	382.321
505	370	380	0.352624	0.31399	0.177207	0.156179	391.551
505	380	350	0.306109	0.325998	0.18094	0.186952	371.274
505	380	360	0.315772	0.324653	0.180449	0.179126	378.394
505	380	370	0.331454	0.321256	0.179764	0.167527	385.882
505	380	380	0.357628	0.312161	0.178463	0.151748	393.924
510	320	350	0.232143	0.281532	0.221905	0.26442	347.689
510	320	360	0.273924	0.308264	0.197373	0.22044	358.469
510	320	370	0.324377	0.315779	0.175343	0.184501	369.706
510	320	380	0.389958	0.293608	0.163961	0.152473	380.674
510	330	320	0.175198	0.234493	0.24173	0.348579	326.363
510	330	330	0.185857	0.244174	0.239718	0.330252	333.68
510	330	340	0.204087	0.260944	0.234333	0.300636	341.829
510	330	350	0.2327	0.285255	0.221162	0.260884	350.985
510	330	360	0.271743	0.309909	0.19838	0.219968	361.322
510	330	370	0.320171	0.317636	0.177322	0.184871	372.21
510	330	380	0.382365	0.297811	0.166164	0.15366	382.892
510	340	320	0.185218	0.248543	0.239803	0.326436	330.468
510	340	330	0.194719	0.256685	0.237125	0.311471	337.773
510	340	340	0.210457	0.270557	0.231353	0.287633	345.654
510	340	350	0.235003	0.290627	0.219271	0.255099	354.341
510	340	360	0.269934	0.3119	0.19918	0.218985	364.13
510	340	370	0.316194	0.319519	0.179382	0.184904	374.692
510	340	380	0.376101	0.301413	0.168446	0.15404	385.164
510	350	320	0.201455	0.268861	0.233695	0.295989	335.071
510	350	330	0.209259	0.274765	0.23056	0.285416	342.243
510	350	340	0.221649	0.284665	0.224917	0.268769	349.767
510	350	350	0.24096	0.299023	0.2148	0.245218	357.967
510	350	360	0.269715	0.314883	0.198964	0.216438	367.093
510	350	370	0.31185	0.321523	0.181684	0.184943	377.188
510	350	380	0.370604	0.304706	0.17092	0.15377	387.536
510	360	320	0.224923	0.294753	0.220068	0.260257	340.052
510	360	330	0.230705	0.297841	0.217255	0.2542	346.99
510	360	340	0.239539	0.303216	0.212793	0.244453	354.214
510	360	350	0.253215	0.31105	0.205854	0.229882	361.93
510	360	360	0.27433	0.319813	0.195845	0.210012	370.314
510	360	370	0.308095	0.323607	0.183767	0.184531	379.619
510	360	380	0.362978	0.308921	0.173869	0.154232	389.779
510	370	320	0.254973	0.319262	0.19965	0.226116	345.372
510	370	330	0.259079	0.31971	0.198057	0.223153	352.145
510	370	340	0.265021	0.321062	0.195817	0.2181	359.107
510	370	360	0.28828	0.325474	0.188684	0.197561	373.972
510	370	370	0.311639	0.325026	0.183365	0.17997	382.263
510	370	380	0.35248	0.314078	0.177271	0.156171	391.483
510	380	340	0.300069	0.326808	0.181583	0.19154	364.343
510	380	350	0.306193	0.326046	0.180996	0.186765	371.224
510	380	360	0.315853	0.32469	0.180498	0.178959	378.344
510	380	370	0.331506	0.321282	0.17981	0.167402	385.831
510	380	380	0.357613	0.312193	0.17851	0.151684	393.871
515	320	340	0.201195	0.255028	0.235464	0.308313	338.16
515	320	350	0.232439	0.281912	0.221764	0.263884	347.643
515	320	360	0.274079	0.308436	0.197325	0.22016	358.412
515	320	370	0.324397	0.315841	0.175396	0.184366	369.638
515	320	380	0.389742	0.293747	0.16404	0.152471	380.6
515	330	320	0.176075	0.235588	0.241638	0.346699	326.338
515	330	330	0.186592	0.245084	0.239574	0.328751	333.656
515	330	340	0.204606	0.261592	0.234156	0.299646	341.796
515	330	350	0.232964	0.28561	0.221032	0.260394	350.936
515	330	360	0.27185	0.310062	0.198359	0.219729	361.26
515	330	370	0.320207	0.317697	0.177373	0.184723	372.145
515	330	380	0.382237	0.297906	0.166239	0.153617	382.824
515	340	320	0.185986	0.249505	0.239626	0.324883	330.449
515	340	330	0.195372	0.257497	0.236925	0.310206	337.753
515	340	340	0.210926	0.27115	0.231155	0.286769	345.62
515	340	350	0.235246	0.290962	0.219144	0.254648	354.291
515	340	360	0.269997	0.312037	0.19918	0.218786	364.065
515	340	370	0.316192	0.319584	0.179443	0.184781	374.625
515	340	380	0.376033	0.301479	0.168518	0.15397	385.101
515	350	320	0.202018	0.269572	0.233471	0.294939	335.046
515	350	330	0.20975	0.275382	0.23034	0.284528	342.212
515	350	340	0.222033	0.285148	0.224719	0.2681	349.729
515	350	350	0.241199	0.299334	0.214667	0.2448	357.919
515	350	360	0.269784	0.315021	0.198956	0.216239	367.031
515	350	370	0.311781	0.321593	0.181759	0.184866	377.118
515	350	380	0.370512	0.304781	0.170992	0.153715	387.474
515	360	320	0.225218	0.295141	0.219913	0.259728	340.012
515	360	330	0.230987	0.2982	0.217104	0.253709	346.949
515	360	340	0.239798	0.303529	0.212654	0.244019	354.172
515	360	350	0.253429	0.311289	0.205748	0.229534	361.883
515	360	360	0.274453	0.319951	0.195814	0.209783	370.258
515	360	370	0.308031	0.323677	0.183832	0.184459	379.547
515	360	380	0.362783	0.309036	0.173945	0.154235	389.71
515	370	320	0.255076	0.319413	0.199645	0.225866	345.324
515	370	330	0.259205	0.319862	0.198042	0.222891	352.098
515	370	340	0.265166	0.321208	0.195794	0.217831	359.06
515	370	360	0.28842	0.325563	0.188679	0.197339	373.921
515	370	370	0.311694	0.325077	0.183396	0.179834	382.204
515	370	380	0.352339	0.314165	0.177335	0.156161	391.416
515	380	320	0.293101	0.328466	0.183016	0.195416	350.921
515	380	330	0.296051	0.327596	0.182325	0.194028	357.561
515	380	340	0.30014	0.326865	0.181646	0.191349	364.293
515	380	350	0.306277	0.326094	0.181051	0.186578	371.175
515	380	360	0.315936	0.324725	0.180548	0.178791	378.295
515	380	370	0.331562	0.321307	0.179856	0.167275	385.781
515	380	380	0.357601	0.312225	0.178557	0.151618	393.818
520	320	340	0.201743	0.255706	0.235303	0.307248	338.128
520	320	350	0.232729	0.282287	0.221626	0.263358	347.597
520	320	360	0.274229	0.308606	0.19728	0.219886	358.354
520	320	370	0.324421	0.315902	0.175448	0.184228	369.571
520	320	380	0.389533	0.293882	0.16412	0.152466	380.526
520	330	320	0.17695	0.236679	0.241537	0.344834	326.313
520	330	330	0.187326	0.245992	0.239423	0.327259	333.633
520	330	340	0.205123	0.262239	0.233976	0.298662	341.763
520	330	350	0.233224	0.28596	0.220905	0.259912	350.886
520	330	360	0.271951	0.310213	0.198341	0.219496	361.198
520	330	370	0.320242	0.317758	0.177424	0.184576	372.08
520	330	380	0.382115	0.297999	0.166314	0.153572	382.756
520	340	320	0.186752	0.250462	0.239442	0.323343	330.43
520	340	330	0.196022	0.258305	0.236722	0.308951	337.733
520	340	340	0.211393	0.271739	0.230957	0.285911	345.587
520	340	350	0.235487	0.291294	0.219018	0.254201	354.242
520	340	360	0.270055	0.312171	0.199183	0.218591	363.999
520	340	370	0.316187	0.319649	0.179504	0.18466	374.558
520	340	380	0.375968	0.301544	0.16859	0.153898	385.038
520	350	320	0.202577	0.270278	0.233245	0.2939	335.021
520	350	330	0.210236	0.275994	0.23012	0.28365	342.181
520	350	340	0.222412	0.285627	0.224522	0.267439	349.691
520	350	350	0.241435	0.299642	0.214536	0.244386	357.872
520	350	360	0.269851	0.315158	0.198948	0.216043	366.969
520	350	370	0.31171	0.321664	0.181835	0.184791	377.049
520	350	380	0.370418	0.304856	0.171065	0.153661	387.412
520	360	320	0.225507	0.295524	0.219762	0.259206	339.972
520	360	330	0.231263	0.298554	0.216957	0.253226	346.907
520	360	340	0.24005	0.303836	0.21252	0.243594	354.13
520	360	350	0.253637	0.311524	0.205647	0.229192	361.837
520	360	360	0.274573	0.320087	0.195784	0.209556	370.203
520	360	370	0.30797	0.323747	0.183897	0.184386	379.476
520	360	380	0.362587	0.309152	0.174023	0.154239	389.642
520	370	330	0.259322	0.32001	0.19803	0.222637	352.051
520	370	340	0.265304	0.321351	0.195775	0.21757	359.013
520	370	350	0.27436	0.323496	0.192721	0.209422	366.232
520	370	360	0.288556	0.325651	0.188674	0.197118	373.871
520	370	370	0.31175	0.325127	0.183427	0.179696	382.147
520	370	380	0.352201	0.314252	0.177399	0.156149	391.349
520	380	330	0.296097	0.327659	0.182396	0.193848	357.511
520	380	340	0.300208	0.326922	0.181709	0.191161	364.244
520	380	350	0.306359	0.326142	0.181107	0.186392	371.126
520	380	360	0.316019	0.324761	0.180597	0.178623	378.246
520	380	370	0.33162	0.321331	0.179902	0.167146	385.731
520	380	380	0.357591	0.312255	0.178604	0.15155	393.766
520	380	380	0.391385	0.328466	0.242081	0.37672	394.193
480	320	320	0.163637	0.217872	0.163477	0.15155	322.758

## Sheet: Sheet2
Case 1	480	320	320	0.163637	0.217872	0.241771	0.37672	322.758
Case 2	480	320	330	0.176078	0.229888	0.240889	0.353145	330.09
Case 3	480	320	340	0.197305	0.250202	0.236505	0.315987	338.392
Case 4	480	320	350	0.230209	0.279103	0.222814	0.267874	347.962
Case 5	480	320	360	0.27289	0.307165	0.197725	0.222219	358.817
Case 6	480	320	370	0.324338	0.315401	0.175011	0.185251	370.127
Case 7	480	320	380	0.391385	0.292713	0.163477	0.152426	381.132
Case 8	480	330	320	0.169939	0.227873	0.242081	0.360108	326.526
Case 9	480	330	330	0.181453	0.238679	0.240446	0.339422	333.837
Case 10	480	330	340	0.200933	0.256991	0.235345	0.306731	342.031
Case 11	480	330	350	0.230989	0.283009	0.221987	0.264015	351.279
Case 12	480	330	360	0.270971	0.308921	0.19858	0.221529	361.692
Case 13	480	330	370	0.319969	0.317266	0.177021	0.185744	372.611
Case 14	480	330	380	0.383244	0.297189	0.165705	0.153861	383.314
Case 15	480	340	320	0.180577	0.2427	0.240732	0.335991	330.594
Case 16	480	340	330	0.190767	0.251742	0.238238	0.319253	337.9
Case 17	480	340	340	0.207586	0.266926	0.232514	0.292975	345.857
Case 18	480	340	350	0.233459	0.288537	0.220062	0.257942	354.645
Case 19	480	340	360	0.269461	0.311034	0.199227	0.220278	364.524
Case 20	480	340	370	0.316153	0.319135	0.179037	0.185675	375.095
Case 21	480	340	380	0.376557	0.300995	0.168012	0.154437	385.551
Case 22	480	350	320	0.197992	0.264472	0.235025	0.302511	335.22
Case 23	480	350	330	0.206219	0.270935	0.231891	0.290956	342.427
Case 24	480	350	340	0.21925	0.281647	0.226143	0.272961	350
Case 25	480	350	350	0.239447	0.297072	0.215637	0.247844	358.262
Case 26	480	350	360	0.269271	0.314032	0.199026	0.217671	367.477
Case 27	480	350	370	0.312212	0.321106	0.181249	0.185432	377.609
Case 28	480	350	380	0.371133	0.304272	0.170486	0.154109	387.909
Case 29	480	360	320	0.223012	0.292273	0.221091	0.263624	340.29
Case 30	480	360	330	0.228854	0.295528	0.218266	0.257353	347.234
Case 31	480	360	340	0.237827	0.30119	0.213734	0.247249	354.467
Case 32	480	360	350	0.251815	0.309512	0.206568	0.232104	362.214
Case 33	480	360	360	0.273568	0.318961	0.196053	0.211418	370.658
Case 34	480	360	370	0.30846	0.323188	0.183384	0.184968	380.045
Case 35	480	360	380	0.364111	0.30825	0.173414	0.154225	390.19
Case 38	480	370	340	0.263989	0.320108	0.196044	0.219858	359.392
Case 39	480	370	350	0.273006	0.32244	0.192956	0.211598	366.62
Case 40	480	370	360	0.287409	0.324924	0.188742	0.198925	374.288
Case 41	480	370	370	0.311344	0.324716	0.18318	0.18076	382.622
Case 42	480	370	380	0.353373	0.313541	0.176889	0.156198	391.892
Case 46	480	380	350	0.305698	0.325752	0.180665	0.187885	371.528
Case 47	480	380	360	0.315409	0.32446	0.180198	0.179932	378.65
Case 48	480	380	370	0.331246	0.321107	0.17953	0.168117	386.144
Case 49	480	380	380	0.357749	0.311979	0.178231	0.15204	394.193
Case 51	485	320	330	0.176849	0.230852	0.240842	0.351457	330.059
Case 52	485	320	340	0.197868	0.250902	0.236365	0.314864	338.358
Case 53	485	320	350	0.230551	0.279526	0.222655	0.267268	347.917
Case 54	485	320	360	0.273072	0.307355	0.19766	0.221913	358.759
Case 55	485	320	370	0.324332	0.315465	0.175068	0.185134	370.055
Case 56	485	320	380	0.391131	0.29287	0.163558	0.152441	381.054
Case 57	485	330	320	0.170812	0.228979	0.242047	0.358162	326.498
Case 58	485	330	330	0.182185	0.239598	0.240341	0.337876	333.809
Case 59	485	330	340	0.201465	0.257658	0.235183	0.305695	341.997
Case 60	485	330	350	0.23129	0.283399	0.221843	0.263468	351.23
Case 61	485	330	360	0.271114	0.309093	0.198538	0.221255	361.631
Case 62	485	330	370	0.32	0.317328	0.177071	0.185601	372.543
Case 63	485	330	380	0.383084	0.297299	0.165782	0.153834	383.242
Case 64	485	340	320	0.181353	0.243681	0.240594	0.334372	330.572
Case 65	485	340	330	0.19143	0.252574	0.238063	0.317933	337.878
Case 66	485	340	340	0.208072	0.267542	0.232323	0.292063	345.823
Case 67	485	340	350	0.233728	0.288896	0.219926	0.25745	354.594
Case 68	485	340	360	0.269552	0.311184	0.199213	0.220051	364.458
Case 69	485	340	370	0.316165	0.319199	0.179093	0.185544	375.027
Case 70	485	340	380	0.376474	0.301068	0.168084	0.154374	385.485
Case 71	485	350	320	0.198581	0.265219	0.234805	0.301395	335.195
Case 72	485	350	330	0.206739	0.27159	0.231667	0.290003	342.397
Case 73	485	350	340	0.219663	0.282165	0.225934	0.272238	349.961
Case 74	485	350	350	0.239709	0.297407	0.215492	0.247392	358.212
Case 75	485	350	360	0.269349	0.314176	0.199014	0.217461	367.412
Case 76	485	350	370	0.312158	0.321175	0.18132	0.185348	377.538
Case 77	485	350	380	0.371047	0.304343	0.170558	0.154052	387.846
Case 78	485	360	320	0.22335	0.292707	0.220908	0.263035	340.251
Case 79	485	360	330	0.229183	0.295934	0.218083	0.256799	347.194
Case 80	485	360	340	0.238132	0.301546	0.213564	0.246758	354.425
Case 81	485	360	350	0.252062	0.30978	0.206439	0.231718	362.165
Case 82	485	360	360	0.273697	0.319105	0.196017	0.211181	370.6
Case 83	485	360	370	0.308401	0.323257	0.183447	0.184895	379.975
Case 84	485	360	380	0.363926	0.30836	0.173489	0.154225	390.121
Case 85	485	370	320	0.254315	0.318434	0.199756	0.227495	345.614
Case 86	485	370	330	0.258317	0.31888	0.198213	0.22459	352.381
Case 87	485	370	340	0.264179	0.320276	0.195996	0.219549	359.344
Case 89	485	370	360	0.287556	0.325018	0.18873	0.198697	374.234
Case 90	485	370	370	0.311388	0.324768	0.183211	0.180633	382.561
Case 91	485	370	380	0.353219	0.313632	0.176952	0.156197	391.824
Case 95	485	380	350	0.305776	0.325802	0.180721	0.187701	371.476
Case 96	485	380	360	0.315474	0.324501	0.180249	0.179776	378.598
Case 97	485	380	370	0.331279	0.321139	0.179577	0.168005	386.091
Case 98	485	380	380	0.357719	0.312018	0.178277	0.151986	394.138
Case 100	490	320	330	0.177623	0.231817	0.240786	0.349774	330.028
Case 101	490	320	340	0.198428	0.251598	0.236223	0.313751	338.324
Case 102	490	320	350	0.230885	0.279942	0.222499	0.266674	347.871
Case 103	490	320	360	0.273251	0.307542	0.197597	0.22161	358.701
Case 104	490	320	370	0.324332	0.315529	0.175125	0.185014	369.984
Case 105	490	320	380	0.390884	0.293024	0.163639	0.152453	380.977
Case 106	490	330	320	0.171688	0.230085	0.242003	0.356225	326.47
Case 107	490	330	330	0.182919	0.240515	0.24023	0.336336	333.782
Case 108	490	330	340	0.201993	0.258321	0.235018	0.304668	341.963
Case 109	490	330	350	0.231585	0.283782	0.221702	0.262931	351.182
Case 110	490	330	360	0.271251	0.309263	0.198499	0.220986	361.569
Case 111	490	330	370	0.320032	0.31739	0.177121	0.185457	372.476
Case 112	490	330	380	0.382929	0.297407	0.165859	0.153805	383.171
Case 113	490	340	320	0.182128	0.244659	0.240449	0.332763	330.55
Case 114	490	340	330	0.192091	0.253403	0.237884	0.316622	337.857
Case 115	490	340	340	0.208556	0.268153	0.232131	0.291161	345.789
Case 116	490	340	350	0.233991	0.28925	0.219792	0.256966	354.543
Case 117	490	340	360	0.269638	0.311331	0.199202	0.219829	364.392
Case 118	490	340	370	0.316175	0.319263	0.179149	0.185413	374.96
Case 119	490	340	380	0.376394	0.301139	0.168157	0.15431	385.42
Case 121	490	350	330	0.207253	0.272238	0.231445	0.289064	342.366
Case 122	490	350	340	0.22007	0.282677	0.225727	0.271525	349.922
Case 123	490	350	350	0.239967	0.297738	0.21535	0.246945	358.162
Case 124	490	350	360	0.269425	0.31432	0.199003	0.217253	367.347
Case 125	490	350	370	0.312101	0.321244	0.181391	0.185264	377.468
Case 126	490	350	380	0.37096	0.304415	0.17063	0.153995	387.784
Case 127	490	360	320	0.22368	0.293132	0.22073	0.262459	340.212
Case 128	490	360	330	0.229504	0.296332	0.217907	0.256258	347.153
Case 129	490	360	340	0.238429	0.301895	0.213399	0.246277	354.383
Case 130	490	360	350	0.252304	0.310044	0.206314	0.231338	362.118
Case 131	490	360	360	0.273826	0.319249	0.19598	0.210944	370.541
Case 132	490	360	370	0.308343	0.323327	0.18351	0.18482	379.904
Case 133	490	360	380	0.36374	0.30847	0.173564	0.154225	390.053
Case 137	490	370	350	0.273373	0.322717	0.192881	0.211029	366.521
Case 138	490	370	360	0.287703	0.32511	0.188719	0.198468	374.181
Case 139	490	370	370	0.311434	0.32482	0.183242	0.180504	382.5
Case 140	490	370	380	0.353067	0.313723	0.177016	0.156195	391.755
Case 144	490	380	350	0.305857	0.325852	0.180776	0.187515	371.425
Case 145	490	380	360	0.315544	0.32454	0.180299	0.179617	378.546
Case 146	490	380	370	0.331317	0.32117	0.179624	0.167889	386.038
Case 147	490	380	380	0.357691	0.312056	0.178324	0.151929	394.084
Case 149	495	320	330	0.178398	0.232781	0.240723	0.348097	329.998
Case 150	495	320	340	0.198986	0.25229	0.236077	0.312648	338.291
Case 151	495	320	350	0.231211	0.28035	0.222346	0.266093	347.826
Case 152	495	320	360	0.273426	0.307727	0.197536	0.221311	358.643
Case 153	495	320	370	0.324337	0.315592	0.175181	0.18489	369.913
Case 154	495	320	380	0.390643	0.293174	0.16372	0.152462	380.9
Case 155	495	330	320	0.172565	0.23119	0.241949	0.354297	326.442
Case 156	495	330	330	0.183653	0.241432	0.240112	0.334804	333.756
Case 157	495	330	340	0.20252	0.258981	0.23485	0.303649	341.929
Case 158	495	330	350	0.231873	0.284158	0.221563	0.262405	351.133
Case 159	495	330	360	0.271383	0.309429	0.198464	0.220723	361.508
Case 160	495	330	370	0.320066	0.317452	0.177171	0.185311	372.409
Case 161	495	330	380	0.38278	0.297512	0.165936	0.153773	383.101
Case 162	495	340	320	0.182902	0.245635	0.240297	0.331165	330.529
Case 163	495	340	330	0.192751	0.254228	0.2377	0.315321	337.835
Case 164	495	340	340	0.209035	0.26876	0.231938	0.290267	345.755
Case 165	495	340	350	0.23425	0.2896	0.219659	0.25649	354.492
Case 166	495	340	360	0.269719	0.311477	0.199193	0.219611	364.327
Case 167	495	340	370	0.316183	0.319327	0.179206	0.185284	374.893
Case 168	495	340	380	0.376317	0.301209	0.168229	0.154245	385.356
Case 169	495	350	320	0.199744	0.266694	0.234364	0.299198	335.146
Case 170	495	350	330	0.207762	0.272879	0.231223	0.288136	342.336
Case 171	495	350	340	0.220473	0.283183	0.225522	0.270823	349.883
Case 172	495	350	350	0.240221	0.298065	0.215209	0.246505	358.113
Case 173	495	350	360	0.2695	0.314462	0.198992	0.217046	367.283
Case 174	495	350	370	0.312042	0.321313	0.181463	0.185182	377.398
Case 175	495	350	380	0.370873	0.304487	0.170702	0.153938	387.722
Case 178	495	360	340	0.238718	0.302236	0.21324	0.245807	354.34
Case 179	495	360	350	0.25254	0.310303	0.206193	0.230964	362.07
Case 180	495	360	360	0.273954	0.319392	0.195945	0.210709	370.484
Case 181	495	360	370	0.308287	0.323396	0.183572	0.184745	379.834
Case 182	495	360	380	0.363552	0.308582	0.17364	0.154226	389.984
Case 183	495	370	320	0.254607	0.318781	0.199697	0.226916	345.518
Case 184	495	370	330	0.258648	0.319226	0.198135	0.22399	352.287
Case 185	495	370	340	0.264537	0.320602	0.195912	0.218949	359.249
Case 186	495	370	350	0.273551	0.322853	0.192847	0.210749	366.472
Case 187	495	370	360	0.28785	0.325203	0.188708	0.198239	374.128
Case 188	495	370	370	0.311483	0.324872	0.183272	0.180373	382.44
Case 189	495	370	380	0.352917	0.313812	0.177079	0.156191	391.686
Case 191	495	380	330	0.295813	0.327345	0.182051	0.194791	357.763
Case 192	495	380	340	0.299838	0.326638	0.1814	0.192125	364.493
Case 193	495	380	350	0.30594	0.325902	0.180831	0.187328	371.374
Case 194	495	380	360	0.315617	0.324579	0.180349	0.179455	378.495
Case 195	495	380	370	0.331358	0.3212	0.179671	0.167771	385.985
Case 196	495	380	380	0.357667	0.312092	0.17837	0.151871	394.03
Case 199	500	320	340	0.199541	0.252979	0.235928	0.311552	338.258
Case 200	500	320	350	0.231529	0.280751	0.222196	0.265524	347.78
Case 201	500	320	360	0.273597	0.307909	0.197479	0.221016	358.585
Case 202	500	320	370	0.324346	0.315655	0.175236	0.184763	369.844
Case 203	500	320	380	0.390408	0.293322	0.163801	0.152469	380.824
Case 204	500	330	320	0.173443	0.232293	0.241886	0.352379	326.415
Case 205	500	330	330	0.184387	0.242347	0.239987	0.333279	333.73
Case 206	500	330	340	0.203044	0.259638	0.234681	0.302637	341.895
Case 207	500	330	350	0.232155	0.284529	0.221427	0.261889	351.084
Case 208	500	330	360	0.27151	0.309592	0.198433	0.220465	361.446
Case 209	500	330	370	0.3201	0.317514	0.177221	0.185165	372.342
Case 210	500	330	380	0.382636	0.297614	0.166012	0.153738	383.031
Case 211	500	340	320	0.183675	0.246608	0.240139	0.329578	330.508
Case 212	500	340	330	0.193409	0.25505	0.237513	0.314028	337.814
Case 213	500	340	340	0.209512	0.269362	0.231744	0.289382	345.721
Case 214	500	340	350	0.234505	0.289946	0.219528	0.25602	354.442
Case 215	500	340	360	0.269795	0.31162	0.199186	0.219398	364.261
Case 216	500	340	370	0.316189	0.319391	0.179264	0.185156	374.826
Case 217	500	340	380	0.376243	0.301278	0.168301	0.154178	385.291
Case 218	500	350	320	0.200318	0.267422	0.234142	0.298118	335.121
Case 219	500	350	330	0.208266	0.273514	0.231002	0.287219	342.305
Case 220	500	350	340	0.220869	0.283682	0.225319	0.270129	349.844
Case 221	500	350	350	0.240471	0.298388	0.215071	0.24607	358.064
Case 222	500	350	360	0.269574	0.314603	0.198982	0.216841	367.219
Case 223	500	350	370	0.31198	0.321383	0.181536	0.185101	377.328
Case 224	500	350	380	0.370784	0.30456	0.170774	0.153882	387.659
Case 225	500	360	320	0.224315	0.293957	0.220389	0.261339	340.132
Case 226	500	360	330	0.230119	0.297102	0.21757	0.255208	347.072
Case 227	500	360	340	0.238999	0.302569	0.213086	0.245346	354.298
Case 228	500	360	350	0.252771	0.310556	0.206076	0.230597	362.023
Case 229	500	360	360	0.274081	0.319534	0.195911	0.210475	370.427
Case 230	500	360	370	0.308228	0.323466	0.183636	0.184671	379.764
Case 231	500	360	380	0.363362	0.308694	0.173716	0.154228	389.916
Case 232	500	370	320	0.254738	0.318946	0.199675	0.22664	345.469
Case 233	500	370	330	0.258801	0.319392	0.198104	0.223703	352.24
Case 234	500	370	340	0.264706	0.320759	0.195876	0.218659	359.201
Case 235	500	370	350	0.273723	0.322986	0.192816	0.210474	366.424
Case 236	500	370	360	0.287995	0.325294	0.188699	0.198012	374.076
Case 237	500	370	370	0.311533	0.324924	0.183303	0.18024	382.38
Case 238	500	370	380	0.352769	0.313902	0.177143	0.156186	391.618
Case 242	500	380	350	0.306024	0.32595	0.180885	0.18714	371.323
Case 243	500	380	360	0.315693	0.324616	0.180399	0.179291	378.444
Case 244	500	380	370	0.331404	0.321228	0.179717	0.16765	385.934
Case 245	500	380	380	0.357646	0.312127	0.178417	0.15181	393.977
Case 248	505	320	340	0.200094	0.253665	0.235776	0.310465	338.225
Case 249	505	320	350	0.23184	0.281145	0.222049	0.264966	347.735
Case 250	505	320	360	0.273763	0.308088	0.197424	0.220725	358.527
Case 251	505	320	370	0.324359	0.315717	0.17529	0.184634	369.775
Case 252	505	320	380	0.39018	0.293467	0.163881	0.152472	380.749
Case 253	505	330	320	0.174321	0.233394	0.241812	0.350473	326.389
Case 254	505	330	330	0.185122	0.243261	0.239855	0.331761	333.705
Case 255	505	330	340	0.203566	0.260292	0.234508	0.301633	341.862
Case 256	505	330	350	0.23243	0.284895	0.221293	0.261382	351.034
Case 257	505	330	360	0.271629	0.309752	0.198405	0.220214	361.384
Case 258	505	330	370	0.320136	0.317575	0.177271	0.185018	372.276
Case 259	505	330	380	0.382498	0.297714	0.166088	0.1537	382.961
Case 260	505	340	320	0.184447	0.247577	0.239974	0.328001	330.488
Case 261	505	340	330	0.194065	0.255869	0.237321	0.312745	337.794
Case 262	505	340	340	0.209986	0.269962	0.231549	0.288504	345.687
Case 263	505	340	350	0.234756	0.290288	0.219399	0.255557	354.391
Case 264	505	340	360	0.269867	0.311761	0.199182	0.219189	364.195
Case 265	505	340	370	0.316193	0.319455	0.179323	0.18503	374.758
Case 266	505	340	380	0.376171	0.301346	0.168374	0.15411	385.228
Case 267	505	350	320	0.200889	0.268144	0.233919	0.297048	335.096
Case 268	505	350	330	0.208765	0.274142	0.230781	0.286312	342.274
Case 269	505	350	340	0.221262	0.284176	0.225117	0.269445	349.806
Case 270	505	350	350	0.240717	0.298707	0.214934	0.245641	358.015
Case 271	505	350	360	0.269645	0.314744	0.198972	0.216639	367.156
Case 272	505	350	370	0.311916	0.321453	0.18161	0.185021	377.258
Case 273	505	350	380	0.370694	0.304633	0.170847	0.153826	387.597
Case 274	505	360	320	0.224622	0.294358	0.220226	0.260793	340.092
Case 275	505	360	330	0.230416	0.297475	0.21741	0.2547	347.031
Case 276	505	360	340	0.239272	0.302896	0.212937	0.244895	354.256
Case 277	505	360	350	0.252996	0.310805	0.205963	0.230236	361.976
Case 278	505	360	360	0.274207	0.319674	0.195877	0.210242	370.37
Case 279	505	360	370	0.308161	0.323536	0.183702	0.184602	379.691
Case 280	505	360	380	0.363171	0.308808	0.173792	0.15423	389.847
Case 281	505	370	320	0.25486	0.319107	0.19966	0.226373	345.421
Case 282	505	370	330	0.258944	0.319553	0.198078	0.223424	352.193
Case 283	505	370	340	0.264867	0.320913	0.195844	0.218376	359.154
Case 284	505	370	350	0.273891	0.323117	0.192788	0.210204	366.375
Case 285	505	370	360	0.288139	0.325384	0.188691	0.197786	374.024
Case 286	505	370	370	0.311585	0.324975	0.183334	0.180106	382.321
Case 287	505	370	380	0.352624	0.31399	0.177207	0.156179	391.551
Case 291	505	380	350	0.306109	0.325998	0.18094	0.186952	371.274
Case 292	505	380	360	0.315772	0.324653	0.180449	0.179126	378.394
Case 293	505	380	370	0.331454	0.321256	0.179764	0.167527	385.882
Case 294	505	380	380	0.357628	0.312161	0.178463	0.151748	393.924
Case 298	510	320	350	0.232143	0.281532	0.221905	0.26442	347.689
Case 299	510	320	360	0.273924	0.308264	0.197373	0.22044	358.469
Case 300	510	320	370	0.324377	0.315779	0.175343	0.184501	369.706
Case 301	510	320	380	0.389958	0.293608	0.163961	0.152473	380.674
Case 302	510	330	320	0.175198	0.234493	0.24173	0.348579	326.363
Case 303	510	330	330	0.185857	0.244174	0.239718	0.330252	333.68
Case 304	510	330	340	0.204087	0.260944	0.234333	0.300636	341.829
Case 305	510	330	350	0.2327	0.285255	0.221162	0.260884	350.985
Case 306	510	330	360	0.271743	0.309909	0.19838	0.219968	361.322
Case 307	510	330	370	0.320171	0.317636	0.177322	0.184871	372.21
Case 308	510	330	380	0.382365	0.297811	0.166164	0.15366	382.892
Case 309	510	340	320	0.185218	0.248543	0.239803	0.326436	330.468
Case 310	510	340	330	0.194719	0.256685	0.237125	0.311471	337.773
Case 311	510	340	340	0.210457	0.270557	0.231353	0.287633	345.654
Case 312	510	340	350	0.235003	0.290627	0.219271	0.255099	354.341
Case 313	510	340	360	0.269934	0.3119	0.19918	0.218985	364.13
Case 314	510	340	370	0.316194	0.319519	0.179382	0.184904	374.692
Case 315	510	340	380	0.376101	0.301413	0.168446	0.15404	385.164
Case 316	510	350	320	0.201455	0.268861	0.233695	0.295989	335.071
Case 317	510	350	330	0.209259	0.274765	0.23056	0.285416	342.243
Case 318	510	350	340	0.221649	0.284665	0.224917	0.268769	349.767
Case 319	510	350	350	0.24096	0.299023	0.2148	0.245218	357.967
Case 320	510	350	360	0.269715	0.314883	0.198964	0.216438	367.093
Case 321	510	350	370	0.31185	0.321523	0.181684	0.184943	377.188
Case 322	510	350	380	0.370604	0.304706	0.17092	0.15377	387.536
Case 323	510	360	320	0.224923	0.294753	0.220068	0.260257	340.052
Case 324	510	360	330	0.230705	0.297841	0.217255	0.2542	346.99
Case 325	510	360	340	0.239539	0.303216	0.212793	0.244453	354.214
Case 326	510	360	350	0.253215	0.31105	0.205854	0.229882	361.93
Case 327	510	360	360	0.27433	0.319813	0.195845	0.210012	370.314
Case 328	510	360	370	0.308095	0.323607	0.183767	0.184531	379.619
Case 329	510	360	380	0.362978	0.308921	0.173869	0.154232	389.779
Case 330	510	370	320	0.254973	0.319262	0.19965	0.226116	345.372
Case 331	510	370	330	0.259079	0.31971	0.198057	0.223153	352.145
Case 332	510	370	340	0.265021	0.321062	0.195817	0.2181	359.107
Case 334	510	370	360	0.28828	0.325474	0.188684	0.197561	373.972
Case 335	510	370	370	0.311639	0.325026	0.183365	0.17997	382.263
Case 336	510	370	380	0.35248	0.314078	0.177271	0.156171	391.483
Case 339	510	380	340	0.300069	0.326808	0.181583	0.19154	364.343
Case 340	510	380	350	0.306193	0.326046	0.180996	0.186765	371.224
Case 341	510	380	360	0.315853	0.32469	0.180498	0.178959	378.344
Case 342	510	380	370	0.331506	0.321282	0.17981	0.167402	385.831
Case 343	510	380	380	0.357613	0.312193	0.17851	0.151684	393.871
Case 346	515	320	340	0.201195	0.255028	0.235464	0.308313	338.16
Case 347	515	320	350	0.232439	0.281912	0.221764	0.263884	347.643
Case 348	515	320	360	0.274079	0.308436	0.197325	0.22016	358.412
Case 349	515	320	370	0.324397	0.315841	0.175396	0.184366	369.638
Case 350	515	320	380	0.389742	0.293747	0.16404	0.152471	380.6
Case 351	515	330	320	0.176075	0.235588	0.241638	0.346699	326.338
Case 352	515	330	330	0.186592	0.245084	0.239574	0.328751	333.656
Case 353	515	330	340	0.204606	0.261592	0.234156	0.299646	341.796
Case 354	515	330	350	0.232964	0.28561	0.221032	0.260394	350.936
Case 355	515	330	360	0.27185	0.310062	0.198359	0.219729	361.26
Case 356	515	330	370	0.320207	0.317697	0.177373	0.184723	372.145
Case 357	515	330	380	0.382237	0.297906	0.166239	0.153617	382.824
Case 358	515	340	320	0.185986	0.249505	0.239626	0.324883	330.449
Case 359	515	340	330	0.195372	0.257497	0.236925	0.310206	337.753
Case 360	515	340	340	0.210926	0.27115	0.231155	0.286769	345.62
Case 361	515	340	350	0.235246	0.290962	0.219144	0.254648	354.291
Case 362	515	340	360	0.269997	0.312037	0.19918	0.218786	364.065
Case 363	515	340	370	0.316192	0.319584	0.179443	0.184781	374.625
Case 364	515	340	380	0.376033	0.301479	0.168518	0.15397	385.101
Case 365	515	350	320	0.202018	0.269572	0.233471	0.294939	335.046
Case 366	515	350	330	0.20975	0.275382	0.23034	0.284528	342.212
Case 367	515	350	340	0.222033	0.285148	0.224719	0.2681	349.729
Case 368	515	350	350	0.241199	0.299334	0.214667	0.2448	357.919
Case 369	515	350	360	0.269784	0.315021	0.198956	0.216239	367.031
Case 370	515	350	370	0.311781	0.321593	0.181759	0.184866	377.118
Case 371	515	350	380	0.370512	0.304781	0.170992	0.153715	387.474
Case 372	515	360	320	0.225218	0.295141	0.219913	0.259728	340.012
Case 373	515	360	330	0.230987	0.2982	0.217104	0.253709	346.949
Case 374	515	360	340	0.239798	0.303529	0.212654	0.244019	354.172
Case 375	515	360	350	0.253429	0.311289	0.205748	0.229534	361.883
Case 376	515	360	360	0.274453	0.319951	0.195814	0.209783	370.258
Case 377	515	360	370	0.308031	0.323677	0.183832	0.184459	379.547
Case 378	515	360	380	0.362783	0.309036	0.173945	0.154235	389.71
Case 379	515	370	320	0.255076	0.319413	0.199645	0.225866	345.324
Case 380	515	370	330	0.259205	0.319862	0.198042	0.222891	352.098
Case 381	515	370	340	0.265166	0.321208	0.195794	0.217831	359.06
Case 383	515	370	360	0.28842	0.325563	0.188679	0.197339	373.921
Case 384	515	370	370	0.311694	0.325077	0.183396	0.179834	382.204
Case 385	515	370	380	0.352339	0.314165	0.177335	0.156161	391.416
Case 386	515	380	320	0.293101	0.328466	0.183016	0.195416	350.921
Case 387	515	380	330	0.296051	0.327596	0.182325	0.194028	357.561
Case 388	515	380	340	0.30014	0.326865	0.181646	0.191349	364.293
Case 389	515	380	350	0.306277	0.326094	0.181051	0.186578	371.175
Case 390	515	380	360	0.315936	0.324725	0.180548	0.178791	378.295
Case 391	515	380	370	0.331562	0.321307	0.179856	0.167275	385.781
Case 392	515	380	380	0.357601	0.312225	0.178557	0.151618	393.818
Case 395	520	320	340	0.201743	0.255706	0.235303	0.307248	338.128
Case 396	520	320	350	0.232729	0.282287	0.221626	0.263358	347.597
Case 397	520	320	360	0.274229	0.308606	0.19728	0.219886	358.354
Case 398	520	320	370	0.324421	0.315902	0.175448	0.184228	369.571
Case 399	520	320	380	0.389533	0.293882	0.16412	0.152466	380.526
Case 400	520	330	320	0.17695	0.236679	0.241537	0.344834	326.313
Case 401	520	330	330	0.187326	0.245992	0.239423	0.327259	333.633
Case 402	520	330	340	0.205123	0.262239	0.233976	0.298662	341.763
Case 403	520	330	350	0.233224	0.28596	0.220905	0.259912	350.886
Case 404	520	330	360	0.271951	0.310213	0.198341	0.219496	361.198
Case 405	520	330	370	0.320242	0.317758	0.177424	0.184576	372.08
Case 406	520	330	380	0.382115	0.297999	0.166314	0.153572	382.756
Case 407	520	340	320	0.186752	0.250462	0.239442	0.323343	330.43
Case 408	520	340	330	0.196022	0.258305	0.236722	0.308951	337.733
Case 409	520	340	340	0.211393	0.271739	0.230957	0.285911	345.587
Case 410	520	340	350	0.235487	0.291294	0.219018	0.254201	354.242
Case 411	520	340	360	0.270055	0.312171	0.199183	0.218591	363.999
Case 412	520	340	370	0.316187	0.319649	0.179504	0.18466	374.558
Case 413	520	340	380	0.375968	0.301544	0.16859	0.153898	385.038
Case 414	520	350	320	0.202577	0.270278	0.233245	0.2939	335.021
Case 415	520	350	330	0.210236	0.275994	0.23012	0.28365	342.181
Case 416	520	350	340	0.222412	0.285627	0.224522	0.267439	349.691
Case 417	520	350	350	0.241435	0.299642	0.214536	0.244386	357.872
Case 418	520	350	360	0.269851	0.315158	0.198948	0.216043	366.969
Case 419	520	350	370	0.31171	0.321664	0.181835	0.184791	377.049
Case 420	520	350	380	0.370418	0.304856	0.171065	0.153661	387.412
Case 421	520	360	320	0.225507	0.295524	0.219762	0.259206	339.972
Case 422	520	360	330	0.231263	0.298554	0.216957	0.253226	346.907
Case 423	520	360	340	0.24005	0.303836	0.21252	0.243594	354.13
Case 424	520	360	350	0.253637	0.311524	0.205647	0.229192	361.837
Case 425	520	360	360	0.274573	0.320087	0.195784	0.209556	370.203
Case 426	520	360	370	0.30797	0.323747	0.183897	0.184386	379.476
Case 427	520	360	380	0.362587	0.309152	0.174023	0.154239	389.642
Case 429	520	370	330	0.259322	0.32001	0.19803	0.222637	352.051
Case 430	520	370	340	0.265304	0.321351	0.195775	0.21757	359.013
Case 431	520	370	350	0.27436	0.323496	0.192721	0.209422	366.232
Case 432	520	370	360	0.288556	0.325651	0.188674	0.197118	373.871
Case 433	520	370	370	0.31175	0.325127	0.183427	0.179696	382.147
Case 434	520	370	380	0.352201	0.314252	0.177399	0.156149	391.349
Case 436	520	380	330	0.296097	0.327659	0.182396	0.193848	357.511
Case 437	520	380	340	0.300208	0.326922	0.181709	0.191161	364.244
Case 438	520	380	350	0.306359	0.326142	0.181107	0.186392	371.126
Case 439	520	380	360	0.316019	0.324761	0.180597	0.178623	378.246
Case 440	520	380	370	0.33162	0.321331	0.179902	0.167146	385.731
Case 441	520	380	380	0.357591	0.312255	0.178604	0.15155	393.766
Maximum	520	380	380	0.391385	0.328466	0.242081	0.37672	394.193
Minimum	480	320	320	0.163637	0.217872	0.163477	0.15155	322.758
