# Supplementary material for: Boosting engineering strategies for plastic hydrocracking applications: a machine learning-based multi-objective optimization framework
Source: Royal Society of Chemistry journal article supplement (doi:10.1039/d4gc05259e), 2025-01-01
Supplement: d4gc05259e2.xlsx [file d4gc05259e2.xlsx]

## Sheet: Search_Results
	mean_test_score	std_test_score	batch_size	max_epochs	module__nodeNum	module__resNum
0	0.360503	0.436041	15	271	7	6
1	0.387781	0.627462	19	1030	12	10
2	0.053157	0.89661	16	1401	19	2
3	0.175536	0.446711	18	565	14	8
4	0.399163	0.546393	15	1067	5	6
5	-0.740708	2.63629	12	1586	19	7
6	-0.858265	2.75155	15	199	9	4
7	0.325688	0.470546	12	1395	6	7
8	0.420412	0.529569	19	1181	14	2
9	0.433091	0.349626	15	820	19	5
10	0.331859	0.527513	15	820	11	5
11	0.460175	0.492149	19	1208	15	2
12	0.243922	0.72597	19	1263	4	2
13	0.361648	0.577874	15	853	20	5
14	0.34341	0.55684	15	688	20	5
15	0.582904	0.359291	19	1214	19	2
16	0.648731	0.283568	19	1215	20	2
17	-2.01999	4.1574	19	1811	20	2
18	-3.27218	7.61886	14	329	5	8
19	0.578537	0.214636	12	1043	4	7
20	0.281209	0.638381	12	1201	4	7
21	-0.758684	2.55088	12	949	4	7
22	-0.101235	1.66267	19	1246	20	3
23	0.306233	0.520271	15	811	20	7
24	0.363233	0.559422	12	1072	4	7
25	0.368648	0.54364	19	1238	20	2
26	0.341541	0.442118	15	319	5	7
27	0.304529	0.405516	12	1301	6	3
28	0.323556	0.597665	12	1307	6	7
29	0.398636	0.590651	15	999	19	5
30	-0.0183631	1.12282	19	843	15	10
31	0.0448111	0.833092	15	995	18	5
32	0.409653	0.41975	15	1215	12	8
33	-0.372786	1.77414	19	1107	20	2
34	0.350896	0.681853	15	1195	18	5
35	-2.30204	4.18696	15	1132	20	8
36	-0.395745	1.65396	15	1247	7	8
37	0.225558	0.734615	15	1008	20	7
38	0.633278	0.318265	19	1333	4	5
39	0.497021	0.540252	19	1320	6	6
40	0.460356	0.471891	19	1346	7	4
41	0.423651	0.625506	15	1046	6	5
42	0.641731	0.313864	19	991	8	8
43	0.357067	0.640825	19	984	9	7
44	0.352015	0.672838	19	1005	11	9
45	0.148743	0.508045	15	633	18	3
46	0.531044	0.374314	12	1031	19	6
47	-0.521979	1.14264	12	1352	19	3
48	-4.66221	8.15113	12	1429	4	6
49	0.464253	0.468055	19	1222	20	2

## Sheet: best_result
mean_test_score	batch_size	max_epochs	module__nodeNum	module__resNum
0.648731	19	1215	20	2
