# Supplementary material for: Boosting engineering strategies for plastic hydrocracking applications: a machine learning-based multi-objective optimization framework
Source: Royal Society of Chemistry journal article supplement (doi:10.1039/d4gc05259e), 2025-01-01
Supplement: d4gc05259e3.xlsx [file d4gc05259e3.xlsx]

## Sheet: sheet1
ratio	b1	b2	naphtha	heavy	WART	naphtha_NORM	heavy_NORM	WART_NORM	SCORE
486.202	379.886	320.001	0.338	0.208	349.171	1	0.703863	0.616118	73.8515
487.338	379.994	321.778	0.337	0.207	349.988	0.99115	0.708155	0.604544	73.4499
481.894	377.083	320	0.329	0.215	347.457	0.920354	0.67382	0.640398	72.6691
499.393	379.984	320.105	0.335	0.191	355.68	0.973451	0.776824	0.523912	71.9604
504.733	379.29	320.025	0.335	0.203	353.575	0.973451	0.725322	0.553731	71.775
485.598	372.974	320.608	0.322	0.222	345.21	0.858407	0.643777	0.672229	71.5138
482.424	373.402	320.006	0.32	0.224	343.73	0.840708	0.635193	0.693195	71.5065
499.06	379.984	321.778	0.333	0.189	356.78	0.955752	0.785408	0.50833	71.3026
484.433	369.92	320.129	0.312	0.228	342.475	0.769912	0.618026	0.710973	69.6003
484.067	368.191	320.039	0.307	0.235	341.489	0.725664	0.587983	0.724941	67.6149
482.536	379.98	342.233	0.33	0.188	364.702	0.929204	0.7897	0.396107	66.5875
480.469	367.251	320.009	0.303	0.24	341.162	0.690265	0.566524	0.729573	65.8705
512.1	379.93	342.077	0.326	0.186	365.358	0.893805	0.798283	0.386814	65.8112
483.137	365.556	320.009	0.298	0.246	340.084	0.646018	0.540773	0.744844	63.966
483.369	364.055	320.008	0.296	0.249	340.022	0.628319	0.527897	0.745722	62.9566
487.512	320.192	370.133	0.316	0.183	369.709	0.80531	0.811159	0.325178	62.0347
513.296	359.91	320.095	0.295	0.26	339.823	0.619469	0.480687	0.748541	61.065
517.622	344.845	372.878	0.318	0.18	374.114	0.823009	0.824034	0.262778	60.536
517.622	347.722	372.518	0.321	0.181	375.729	0.849558	0.819742	0.2399	60.2277
512.063	357.145	320	0.289	0.267	338.311	0.566372	0.450644	0.76996	58.9221
517.126	348.948	376.495	0.314	0.164	379.628	0.787611	0.892704	0.184667	58.6505
517.154	345.917	376.495	0.311	0.166	378.864	0.761062	0.88412	0.19549	58.2666
513.937	354.718	320.099	0.283	0.275	337.552	0.513274	0.416309	0.780712	56.3917
512.084	337.244	376.957	0.305	0.16	382.505	0.707965	0.909871	0.143911	56.1038
512.142	379.922	374.791	0.315	0.147	390.13	0.79646	0.965665	0.0358964	55.949
512.1	379.922	376.443	0.315	0.139	392.356	0.79646	1	0.0043631	55.7132
511.092	379.105	376.523	0.316	0.142	392.664	0.80531	0.987124	0	55.5628
511.092	377.553	376.523	0.316	0.148	391.927	0.80531	0.961373	0.0104403	55.4094
487.354	330.028	379.658	0.3	0.157	382.485	0.663717	0.922747	0.144195	55.3908
509.421	358.095	376.555	0.31	0.16	386.819	0.752212	0.909871	0.0827998	55.3583
512.062	357.265	376.988	0.308	0.162	386.33	0.734513	0.901288	0.0897269	55.0205
512.191	353.499	320.001	0.278	0.279	336.56	0.469027	0.399142	0.794764	54.8485
513.565	352.761	320.099	0.277	0.282	336.294	0.460177	0.386266	0.798532	54.2769
512.191	351.845	320.001	0.274	0.287	335.45	0.433628	0.364807	0.810488	53.1457
512.505	350.79	320.001	0.271	0.291	335.025	0.40708	0.347639	0.816509	52.0222
510.75	347.903	320.044	0.267	0.304	334.117	0.371681	0.291845	0.829372	49.8067
517.622	347.722	321.326	0.263	0.299	335.012	0.336283	0.313305	0.816693	49.0753
513.937	342.967	320.005	0.255	0.313	331.95	0.265487	0.253219	0.860069	46.9444
519.997	338.512	320.001	0.252	0.32	330.856	0.238938	0.223176	0.875567	46.0581
512.997	341.326	320.024	0.252	0.319	331.644	0.238938	0.227468	0.864404	45.8458
519.252	336.87	320.002	0.248	0.326	330.317	0.20354	0.197425	0.883202	44.9352
516.771	336.774	320.005	0.247	0.33	330.286	0.19469	0.180258	0.883641	44.4073
510.907	337.401	320.028	0.244	0.335	329.18	0.168142	0.158798	0.899309	43.8854
510.887	336.042	320.115	0.241	0.338	328.646	0.141593	0.145923	0.906873	43.3508
497.658	332.854	320.041	0.235	0.345	326.9	0.0884956	0.11588	0.931607	42.578
512.403	328.459	320.001	0.234	0.349	326.197	0.079646	0.0987124	0.941566	42.4222
510.209	326.037	320.447	0.231	0.353	325.527	0.0530973	0.0815451	0.951057	42.0028
509.365	323.342	320.002	0.228	0.36	324.715	0.0265487	0.0515021	0.962559	41.494
485.907	320.003	320	0.225	0.372	322.072	0	0	1	41.4214
486.065	321.685	321.777	0.226	0.366	323.6	0.00884956	0.0257511	0.978354	41.3194
